# Supplementary material for: Structural, magnetic and calorimetric studies of a crystalline phase of the spin crossover compound [Fe(tzpy)2(NCSe)2]
Source: Royal Society of Chemistry journal article supplement (doi:10.1039/c3ce00003f), 2013-01-01

## Supporting Information

### Structural, magnetic and calorimetric studies of a crystalline phase of the spin crossover compound $[\text{Fe}(\text{tzpy})_2(\text{NCSe})_2]$

Zulema Arcís-Castillo, Lucía Piñeiro-López, M. Carmen Muñoz, Rafael Ballesteros, Belén Abarca, José Antonio Real

**Figure S1.** Intermolecular interactions of complex molecules generated by symmetry operation  $iii = -x, -y, -z+2$ .

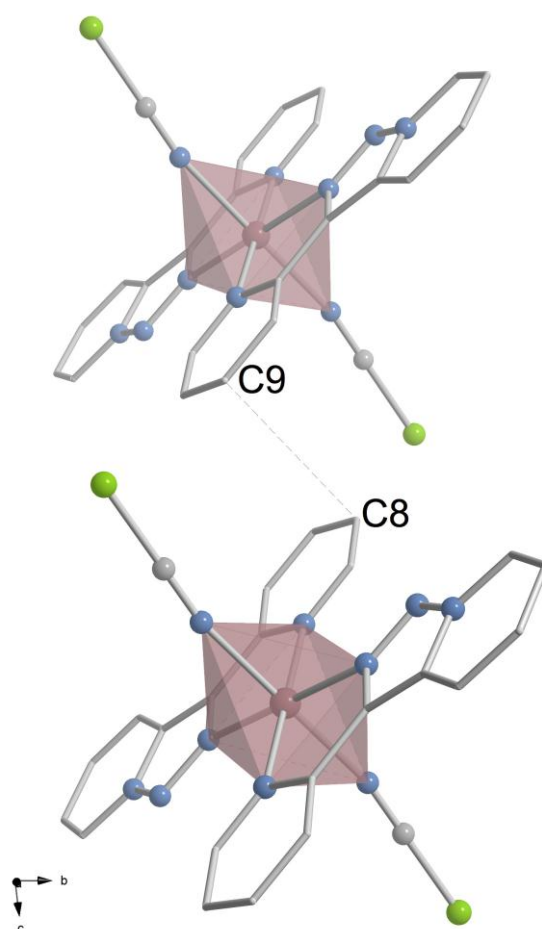

### Synthesis of precipitated samples of $[\text{Fe}(\text{tzpy})_2(\text{NCSe})_2]$ (**4**)

To a solution of  $\text{FeSO}_4 \cdot 7\text{H}_2\text{O}$  (69.5 mg, 0.25 mmol) in methanol (5 mL) was added an aqueous solution of  $\text{KNCSe}$  (51.5 mg, 0.5 mmol) and  $\text{tzpy}$  (98 mg, 0.5 mmol). The red-orange solution was stirred for two hours under an argon atmosphere. The solvent was removed at reduced pressure and the solid was washed with water to remove traces of  $\text{K}_2\text{SO}_4$  giving an ocher precipitated of **4** (122 mg, 75%). Figure S2 displays the experimental X-ray powder diffraction pattern (XRPD) of a precipitated sample of **4** (left, red color) together with the XRPD calculated from single crystal data of **4** (left, black) and magnetic behavior (right) of precipitated samples.

Figure S2

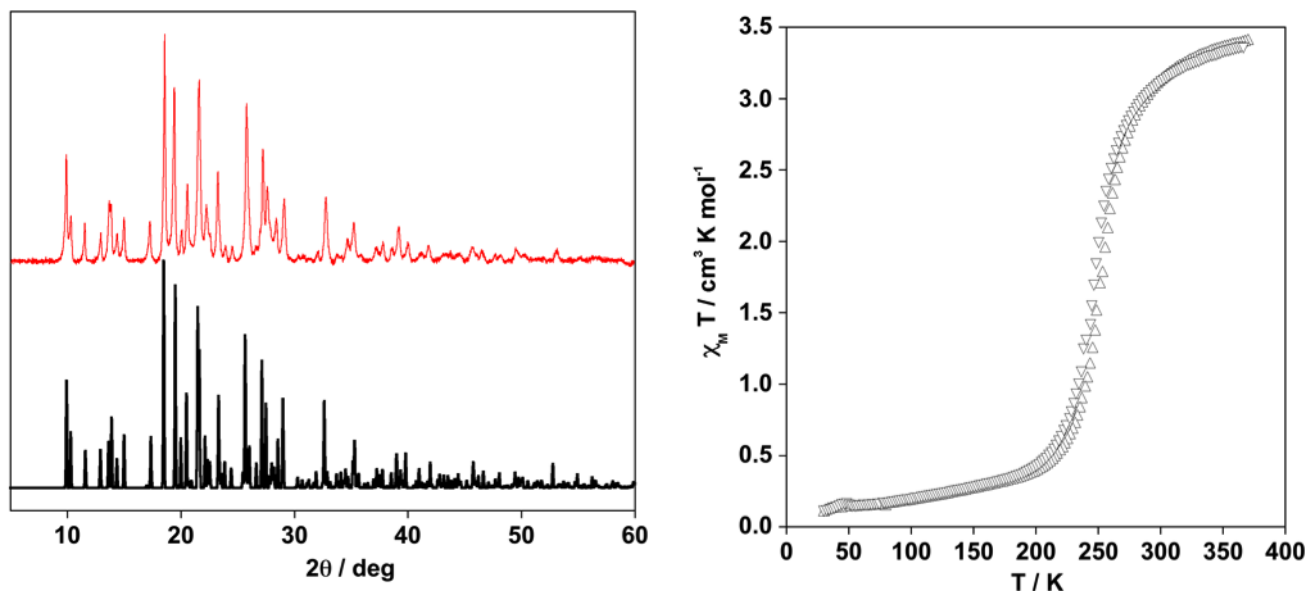

Supplement: c3ce00003f.pdf [file c3ce00003f.pdf]
